# Supplementary material
Source: MDPI journal article supplement (https://www.mdpi.com/2311-5629/8/4/53)
Supplement: s1 [file s1]

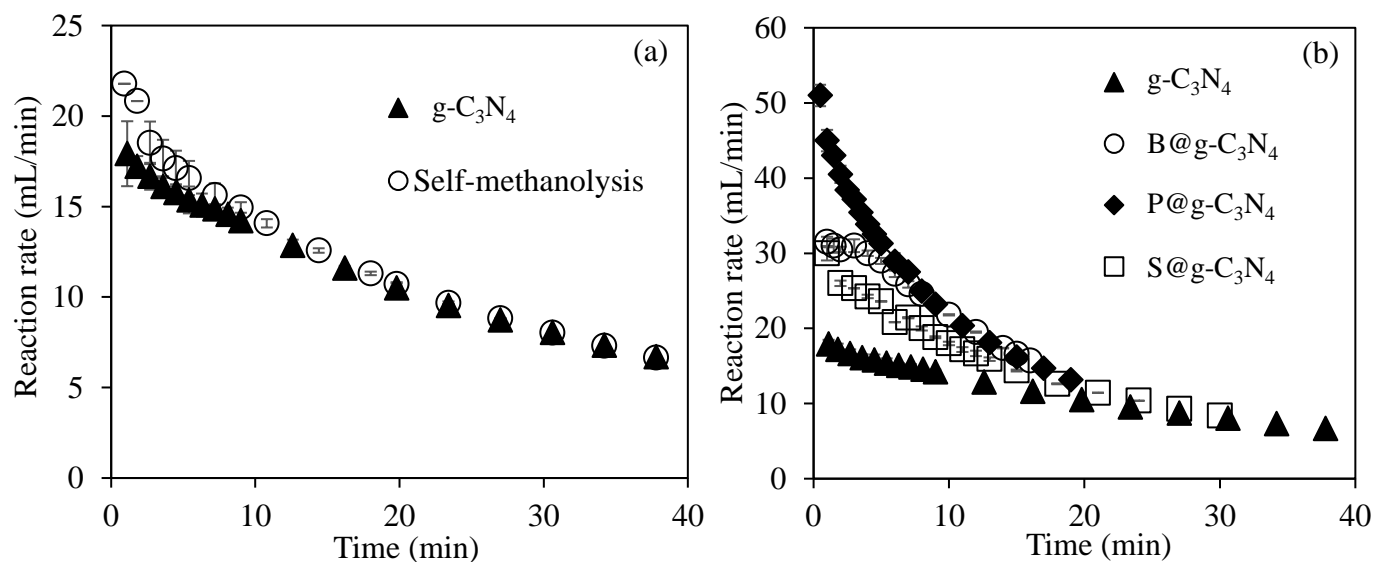

Figure S1. The comparison of reaction rate vs time plots of (a) native  $\text{g-C}_3\text{N}_4$  with self-methanolysis, (b) native  $\text{g-C}_3\text{N}_4$  with  $\text{H@g-C}_3\text{N}_4$  (H: B, P or S) on dehydrogenation reaction of  $\text{NaBH}_4$  in methanol [Reaction condition: 50 mg catalyst, 20 mL methanol, 0.0965 g  $\text{NaBH}_4$ , 25  $^\circ\text{C}$ , 1000 rpm].

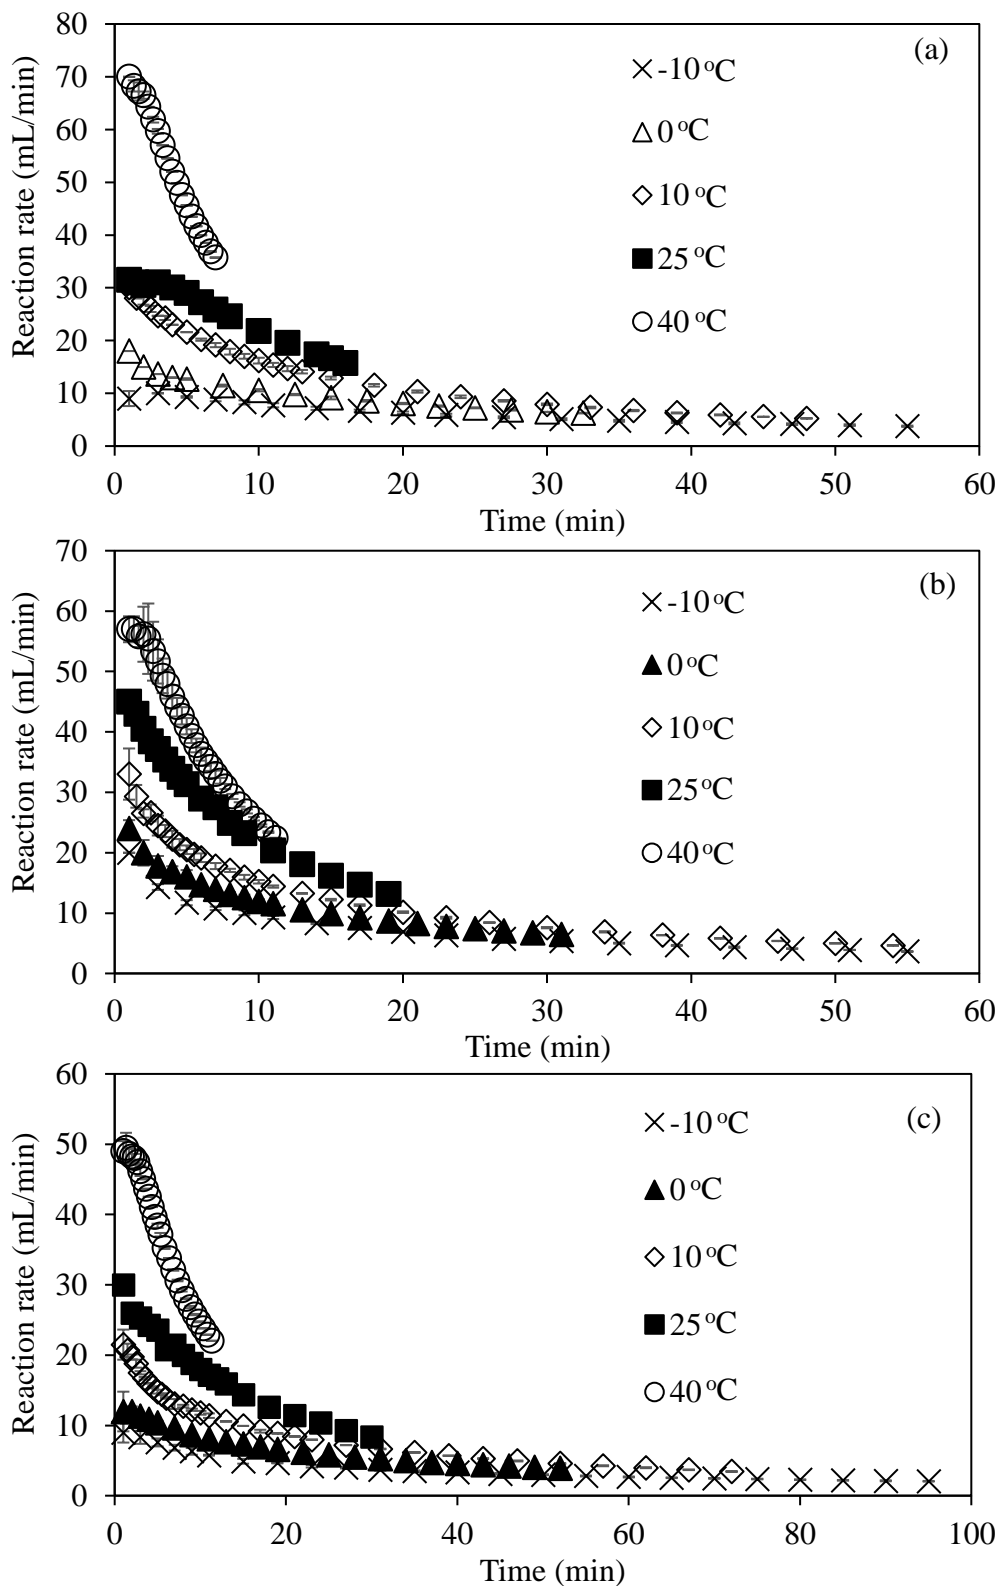

Figure S2. The comparison of calculated reaction values for (a) B@g-C<sub>3</sub>N<sub>4</sub>, (b) P@g-C<sub>3</sub>N<sub>4</sub>, and (c) S@g-C<sub>3</sub>N<sub>4</sub> catalyzed dehydrogenation reaction of NaBH<sub>4</sub> in methanol.

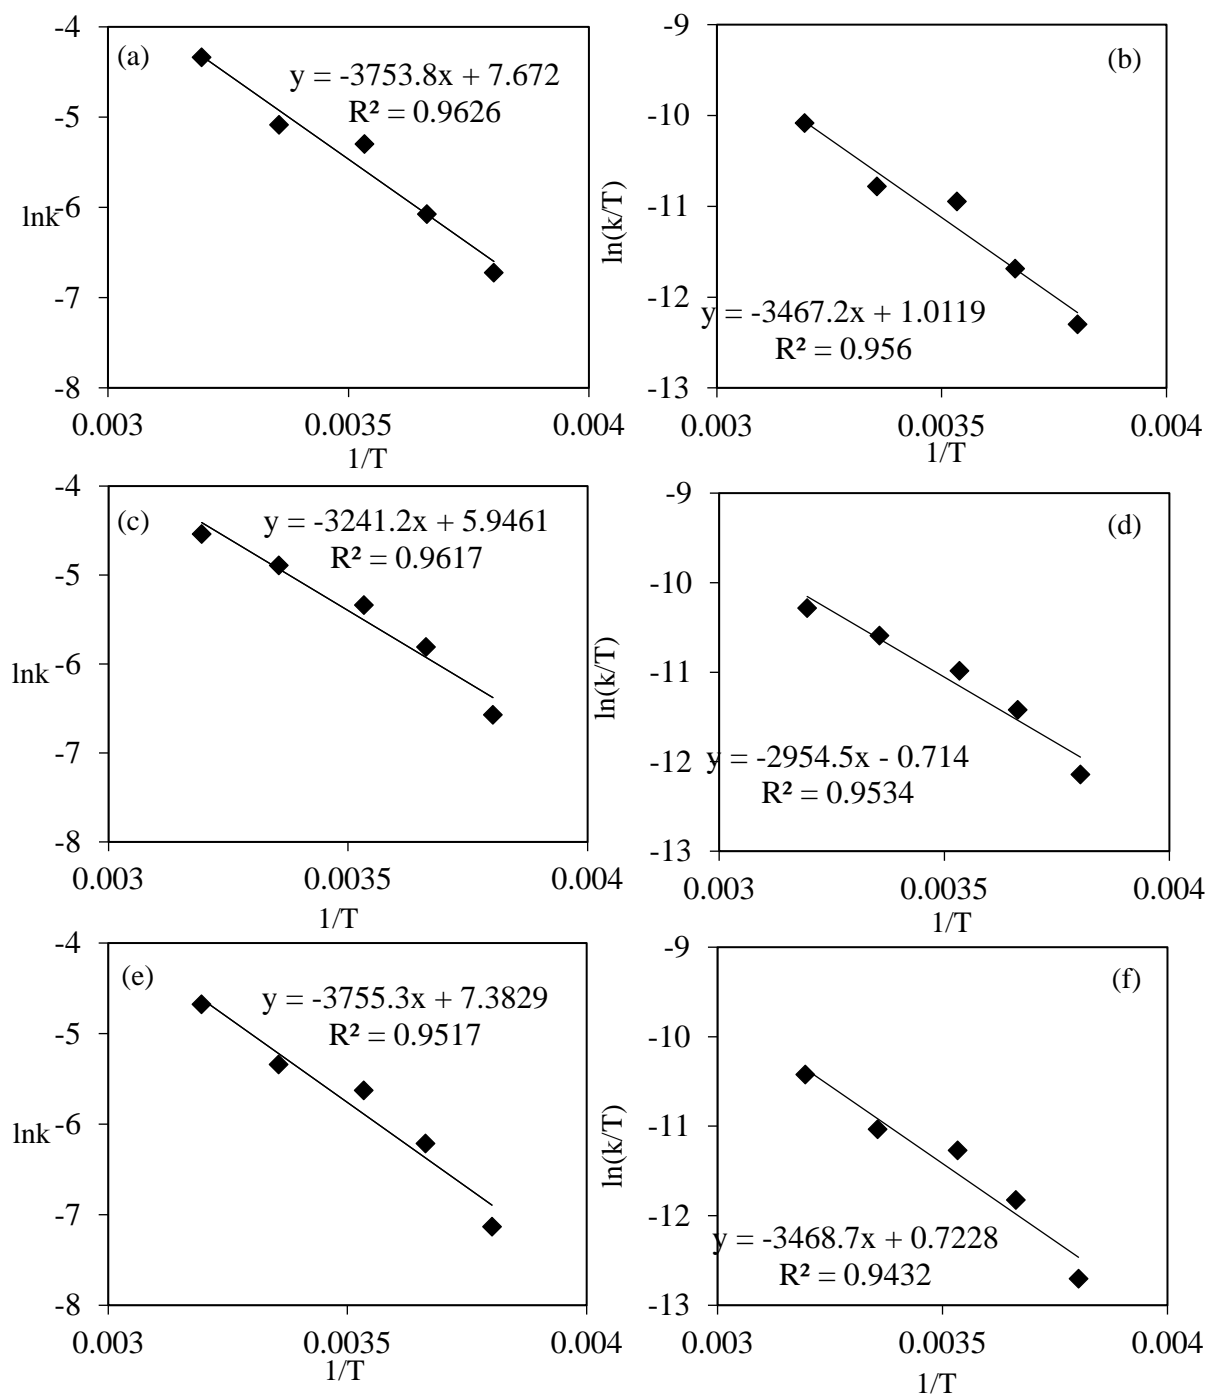

Figure S3. The plotted (a) Arrhenius, and (b) Eyring graph for B@g-C<sub>3</sub>N<sub>4</sub> catalyzed reaction, (c) Arrhenius, and (d) Eyring graph for P@g-C<sub>3</sub>N<sub>4</sub> catalyzed reaction, and (e) Arrhenius, and (f) Eyring graph for S@g-C<sub>3</sub>N<sub>4</sub> catalyzed reaction.
